# Supplementary material
Source: PubMed Central journal article supplement (PMC3023228)
Supplement: supp_00326.2010_legend.pdf [file supp_00326.2010_legend.pdf]

**Supplemental Figure 1.** Gal-3 deficiency did not alter interstitial matrix in uninjured kidneys. Contralateral kidneys were stained with picosirius red. Representative brightfield (upper panel) and polarized (lower panel) photomicrographs of picosirius red staining demonstrate no significant difference between Gal-3 deficient and wild-type mice.
