# Supplementary material
Source: PubMed Central journal article supplement (PMC3023228)

Gal-3 +/+

Gal-3 -/-

Sirius Red

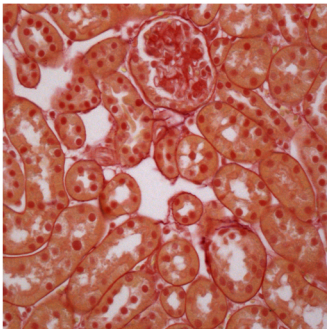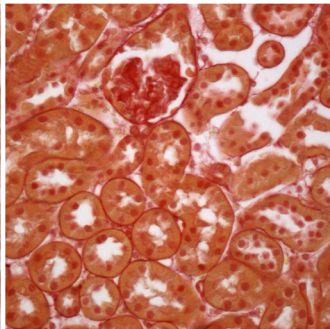

Polarized Sirius Red

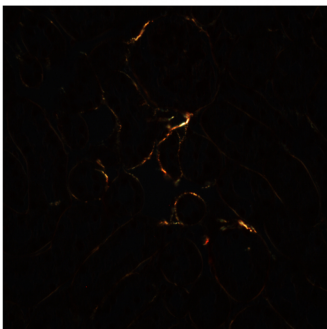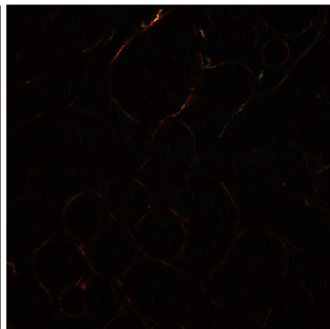

Supplement: supp_00326.2010_renalsupfig.pdf [file supp_00326.2010_renalsupfig.pdf]
